# Supplementary material for: Spillover of a Tobamovirus from the Australian Indigenous Flora to Invasive Weeds
Source: MDPI journal article supplement (doi:10.3390/v14081676), 2022-07-29
Supplement: s1 [file s1]

**Table S1.** Wild Plants tested for the presence of yellow tailflower mild mottle virus, their collection sites in Perth metropolitan region (LY, Yanchep; LP, Ledge Point; LT, Lake Thetis; DT, Dirt Track; SH, Sandhills; BL, Bibra Lake; CR, Canning River; BTA and BTB, Bertram; MU: Murdoch; DR, Dixon Road; LM and LMB, Leeming), Western Australia.

| No. | Species                        | Label of sample | RT-PCR test <sup>a</sup> |
|-----|--------------------------------|-----------------|--------------------------|
| 1   | <i>Anthocercis illicifolia</i> | LY1             | Negative                 |
| 2   | <i>A. illicifolia</i>          | LY2             | Negative                 |
| 3   | <i>A. illicifolia</i>          | LY3             | Negative                 |
| 4   | <i>A. illicifolia</i>          | LY4             | Negative                 |
| 5   | <i>A. illicifolia</i>          | LY5             | Negative                 |
| 6   | <i>A. illicifolia</i>          | LY6             | Negative                 |
| 7   | <i>A. illicifolia</i>          | LY7             | Negative                 |
| 8   | <i>A. illicifolia</i>          | LY8             | Positive                 |
| 9   | <i>A. illicifolia</i>          | LY9             | Negative                 |
| 10  | <i>A. illicifolia</i>          | LY10            | Negative                 |
| 11  | <i>A. illicifolia</i>          | LY11            | Positive                 |
| 12  | <i>A. illicifolia</i>          | LY12            | Positive                 |
| 13  | <i>A. illicifolia</i>          | LY13            | Negative                 |
| 14  | <i>A. illicifolia</i>          | LY14            | Negative                 |
| 15  | <i>A. illicifolia</i>          | LY15            | Positive                 |
| 16  | <i>A. illicifolia</i>          | LY16            | Positive                 |
| 17  | <i>A. illicifolia</i>          | LY17            | Positive                 |
| 18  | <i>A. illicifolia</i>          | LY18            | Negative                 |
| 19  | <i>A. illicifolia</i>          | LY19            | Negative                 |
| 20  | <i>A. illicifolia</i>          | LY20            | Negative                 |
| 21  | <i>A. illicifolia</i>          | LY21            | Negative                 |
| 22  | <i>A. illicifolia</i>          | LY22            | Negative                 |
| 23  | <i>A. illicifolia</i>          | LY23            | Negative                 |
| 24  | <i>A. illicifolia</i>          | LY24            | Positive                 |
| 25  | <i>A. illicifolia</i>          | LY25            | Positive                 |
| 26  | <i>A. illicifolia</i>          | LY26            | Negative                 |
| 27  | <i>A. illicifolia</i>          | LP1             | Positive                 |
| 28  | <i>A. illicifolia</i>          | LP2             | Positive                 |
| 29  | <i>A. illicifolia</i>          | LP3             | Positive                 |
| 30  | <i>A. illicifolia</i>          | LP4             | Positive                 |
| 31  | <i>A. illicifolia</i>          | LP5             | Positive                 |
| 32  | <i>A. illicifolia</i>          | LT1             | Negative                 |
| 33  | <i>A. illicifolia</i>          | LT2             | Negative                 |
| 34  | <i>A. illicifolia</i>          | LT3             | Negative                 |
| 35  | <i>A. illicifolia</i>          | LT4             | Negative                 |
| 36  | <i>A. illicifolia</i>          | LT5             | Negative                 |
| 37  | <i>A. illicifolia</i>          | LT6             | Positive                 |
| 38  | <i>A. illicifolia</i>          | LT7             | Positive                 |

|    |                             |      |          |
|----|-----------------------------|------|----------|
| 39 | <i>A. illicifolia</i>       | LT8  | Positive |
| 40 | <i>A. illicifolia</i>       | LT9  | Positive |
| 41 | <i>A. illicifolia</i>       | LT10 | Positive |
| 42 | <i>A. illicifolia</i>       | LT11 | Positive |
| 43 | <i>A. illicifolia</i>       | LT12 | Positive |
| 44 | <i>A. illicifolia</i>       | LT13 | Positive |
| 45 | <i>A. illicifolia</i>       | LT14 | Positive |
| 46 | <i>A. illicifolia</i>       | LT15 | Positive |
| 47 | <i>A. illicifolia</i>       | LT16 | Negative |
| 48 | <i>A. illicifolia</i>       | LT17 | Negative |
| 49 | <i>A. illicifolia</i>       | LT18 | Positive |
| 50 | <i>A. illicifolia</i>       | LT19 | Positive |
| 51 | <i>A. illicifolia</i>       | LT20 | Positive |
| 52 | <i>A. illicifolia</i>       | LT21 | Negative |
| 53 | <i>Anthocercis littoria</i> | LP6  | Negative |
| 54 | <i>A. littoria</i>          | LP7  | Negative |
| 55 | <i>A. littoria</i>          | LP8  | Negative |
| 56 | <i>A. littoria</i>          | LP9  | Negative |
| 57 | <i>A. littoria</i>          | LP10 | Negative |
| 58 | <i>A. littoria</i>          | LP11 | Negative |
| 59 | <i>A. littoria</i>          | LP12 | Negative |
| 60 | <i>A. littoria</i>          | LP13 | Negative |
| 61 | <i>A. littoria</i>          | LP14 | Negative |
| 62 | <i>A. littoria</i>          | LP15 | Negative |
| 63 | <i>A. littoria</i>          | LP16 | Negative |
| 64 | <i>A. littoria</i>          | LP17 | Negative |
| 65 | <i>A. littoria</i>          | LP18 | Negative |
| 66 | <i>A. littoria</i>          | LP19 | Negative |
| 67 | <i>A. littoria</i>          | LP20 | Negative |
| 68 | <i>A. littoria</i>          | LP21 | Negative |
| 69 | <i>A. littoria</i>          | LP22 | Negative |
| 70 | <i>A. littoria</i>          | LP23 | Negative |
| 71 | <i>A. littoria</i>          | LP24 | Negative |
| 72 | <i>A. littoria</i>          | LP25 | Negative |
| 73 | <i>A. littoria</i>          | LP26 | Negative |
| 74 | <i>A. littoria</i>          | LP27 | Negative |
| 75 | <i>A. littoria</i>          | LP28 | Negative |
| 76 | <i>A. littoria</i>          | LP29 | Negative |
| 77 | <i>A. littoria</i>          | LP30 | Negative |
| 78 | <i>A. littoria</i>          | LP31 | Negative |
| 79 | <i>A. littoria</i>          | LP32 | Negative |
| 80 | <i>A. littoria</i>          | LP33 | Negative |
| 81 | <i>A. littoria</i>          | DT1  | Negative |
| 82 | <i>A. littoria</i>          | DT2  | Positive |

|     |                             |      |          |
|-----|-----------------------------|------|----------|
| 83  | <i>A. littoria</i>          | DT3  | Positive |
| 84  | <i>A. littoria</i>          | DT4  | Positive |
| 85  | <i>A. littoria</i>          | DT5  | Negative |
| 86  | <i>A. littoria</i>          | SH1  | Positive |
| 87  | <i>A. littoria</i>          | SH2  | Positive |
| 88  | <i>A. littoria</i>          | SH3  | Negative |
| 89  | <i>A. littoria</i>          | SH4  | Negative |
| 90  | <i>A. littoria</i>          | SH5  | Negative |
| 91  | <i>A. littoria</i>          | SH6  | Positive |
| 92  | <i>A. littoria</i>          | SH7  | Positive |
| 93  | <i>A. littoria</i>          | SH8  | Positive |
| 94  | <i>A. littoria</i>          | SH9  | Positive |
| 95  | <i>A. littoria</i>          | SH10 | Negative |
| 96  | <i>A. littoria</i>          | SH11 | Positive |
| 97  | <i>A. littoria</i>          | SH12 | Positive |
| 98  | <i>A. littoria</i>          | SH13 | Negative |
| 99  | <i>A. littoria</i>          | SH14 | Positive |
| 100 | <i>A. littoria</i>          | SH15 | Positive |
| 101 | <i>A. littoria</i>          | SH16 | Negative |
| 102 | <i>A. littoria</i>          | SH17 | Negative |
| 103 | <i>A. littoria</i>          | SH18 | Negative |
| 104 | <i>A. littoria</i>          | SH19 | Negative |
| 105 | <i>A. littoria</i>          | SH20 | Positive |
| 106 | <i>A. littoria</i>          | SH21 | Positive |
| 107 | <i>A. littoria</i>          | SH22 | Negative |
| 108 | <i>A. littoria</i>          | SH23 | Negative |
| 109 | <i>Physalis peruviana</i>   | LY27 | Negative |
| 110 | <i>P. peruviana</i>         | LY28 | Positive |
| 111 | <i>P. peruviana</i>         | LY29 | Positive |
| 112 | <i>P. peruviana</i>         | LY30 | Negative |
| 113 | <i>P. peruviana</i>         | LY31 | Positive |
| 114 | <i>P. peruviana</i>         | LY32 | Positive |
| 115 | <i>P. peruviana</i>         | LY33 | Positive |
| 116 | <i>P. peruviana</i>         | LY60 | Positive |
| 117 | <i>Solanum lycopersicum</i> | BL12 | Negative |
| 118 | <i>S. nigrum</i>            | LY34 | Positive |
| 119 | <i>S. nigrum</i>            | LY35 | Negative |
| 120 | <i>S. nigrum</i>            | LY36 | Positive |
| 121 | <i>S. nigrum</i>            | LY37 | Positive |
| 122 | <i>S. nigrum</i>            | LY38 | Negative |
| 123 | <i>S. nigrum</i>            | LY39 | Negative |
| 124 | <i>S. nigrum</i>            | LY40 | Positive |
| 125 | <i>S. nigrum</i>            | LY41 | Positive |
| 126 | <i>S. nigrum</i>            | LY42 | Positive |

|     |                  |       |          |
|-----|------------------|-------|----------|
| 127 | <i>S. nigrum</i> | LY43  | Positive |
| 128 | <i>S. nigrum</i> | LY44  | Negative |
| 129 | <i>S. nigrum</i> | LY45  | Negative |
| 130 | <i>S. nigrum</i> | LY46  | Positive |
| 131 | <i>S. nigrum</i> | LY47  | Negative |
| 132 | <i>S. nigrum</i> | LY48  | Positive |
| 133 | <i>S. nigrum</i> | LY49  | Negative |
| 134 | <i>S. nigrum</i> | LY50  | Positive |
| 135 | <i>S. nigrum</i> | LY51  | Positive |
| 136 | <i>S. nigrum</i> | LY52  | Positive |
| 137 | <i>S. nigrum</i> | LY53  | Negative |
| 138 | <i>S. nigrum</i> | LY54  | Negative |
| 139 | <i>S. nigrum</i> | LY55  | Negative |
| 140 | <i>S. nigrum</i> | LY56  | Positive |
| 141 | <i>S. nigrum</i> | LY57  | Positive |
| 142 | <i>S. nigrum</i> | LY58  | Negative |
| 143 | <i>S. nigrum</i> | LY59  | Positive |
| 144 | <i>S. nigrum</i> | BL1   | Negative |
| 145 | <i>S. nigrum</i> | BL2   | Negative |
| 146 | <i>S. nigrum</i> | BL3   | Negative |
| 147 | <i>S. nigrum</i> | BL4   | Negative |
| 148 | <i>S. nigrum</i> | BL5   | Positive |
| 149 | <i>S. nigrum</i> | BL6   | Negative |
| 150 | <i>S. nigrum</i> | BL7   | Negative |
| 151 | <i>S. nigrum</i> | BL8   | Positive |
| 152 | <i>S. nigrum</i> | BL9   | Negative |
| 153 | <i>S. nigrum</i> | BL10  | Negative |
| 154 | <i>S. nigrum</i> | BL11  | Negative |
| 155 | <i>S. nigrum</i> | CR1   | Negative |
| 156 | <i>S. nigrum</i> | CR2   | Negative |
| 157 | <i>S. nigrum</i> | CR3   | Negative |
| 158 | <i>S. nigrum</i> | CR4   | Negative |
| 159 | <i>S. nigrum</i> | BTA1  | Positive |
| 160 | <i>S. nigrum</i> | BTA2  | Positive |
| 161 | <i>S. nigrum</i> | BTA3  | Negative |
| 162 | <i>S. nigrum</i> | BTA4  | Positive |
| 163 | <i>S. nigrum</i> | BTA5  | Positive |
| 164 | <i>S. nigrum</i> | BTA6  | Positive |
| 165 | <i>S. nigrum</i> | BTA7  | Positive |
| 166 | <i>S. nigrum</i> | BTA8  | Negative |
| 167 | <i>S. nigrum</i> | BTA9  | Negative |
| 168 | <i>S. nigrum</i> | BTA10 | Positive |
| 169 | <i>S. nigrum</i> | BTB1  | Positive |
| 170 | <i>S. nigrum</i> | BTB2  | Negative |

|     |                  |       |          |
|-----|------------------|-------|----------|
| 171 | <i>S. nigrum</i> | BTB3  | Positive |
| 172 | <i>S. nigrum</i> | BTB4  | Negative |
| 173 | <i>S. nigrum</i> | BTB5  | Positive |
| 174 | <i>S. nigrum</i> | BTB6  | Positive |
| 175 | <i>S. nigrum</i> | BTB7  | Negative |
| 176 | <i>S. nigrum</i> | MU1   | Negative |
| 177 | <i>S. nigrum</i> | MU2   | Negative |
| 178 | <i>S. nigrum</i> | MU3   | Negative |
| 179 | <i>S. nigrum</i> | MU4   | Negative |
| 180 | <i>S. nigrum</i> | DR1   | Negative |
| 181 | <i>S. nigrum</i> | DR2   | Positive |
| 182 | <i>S. nigrum</i> | DR3   | Positive |
| 183 | <i>S. nigrum</i> | DR4   | Positive |
| 184 | <i>S. nigrum</i> | DR5   | Negative |
| 185 | <i>S. nigrum</i> | DR6   | Positive |
| 186 | <i>S. nigrum</i> | LM1   | Positive |
| 187 | <i>S. nigrum</i> | LM2   | Negative |
| 188 | <i>S. nigrum</i> | LM3   | Positive |
| 189 | <i>S. nigrum</i> | LM4   | Positive |
| 190 | <i>S. nigrum</i> | LM5   | Positive |
| 191 | <i>S. nigrum</i> | LM6   | Positive |
| 192 | <i>S. nigrum</i> | LM7   | Negative |
| 193 | <i>S. nigrum</i> | LM8   | Negative |
| 194 | <i>S. nigrum</i> | LM9   | Positive |
| 195 | <i>S. nigrum</i> | LM10  | Positive |
| 196 | <i>S. nigrum</i> | LM11  | Positive |
| 197 | <i>S. nigrum</i> | LM12  | Negative |
| 198 | <i>S. nigrum</i> | LM13  | Negative |
| 199 | <i>S. nigrum</i> | LM14  | Negative |
| 200 | <i>S. nigrum</i> | LMB1  | Positive |
| 201 | <i>S. nigrum</i> | LMB2  | Positive |
| 202 | <i>S. nigrum</i> | LMB3  | Positive |
| 203 | <i>S. nigrum</i> | LMB4  | Negative |
| 204 | <i>S. nigrum</i> | LMB5  | Negative |
| 205 | <i>S. nigrum</i> | LMB6  | Positive |
| 206 | <i>S. nigrum</i> | LMB7  | Positive |
| 207 | <i>S. nigrum</i> | LMB8  | Negative |
| 208 | <i>S. nigrum</i> | LMB9  | Negative |
| 209 | <i>S. nigrum</i> | LMB10 | Negative |

<sup>a</sup> Positive or negative for the presence of YTMMV using virus-specific primers YTMMVCPF: 5'-GCTTAAAGAGCGAATTGATGAG and YTMMVCPR: 5'-CCATTGTAGTCTTGACAGCAC that amplified a fragment of the viral coat protein.

**Table S2.** Host species and original location of yellow tailflower mild mottle virus (YTMMV) isolates used in this study. Genbank accession codes are of partial (356 nt) viral CP genes.

| Species                        | Location             | YTMMV isolate | Genbank accession |
|--------------------------------|----------------------|---------------|-------------------|
| <i>Solanum nigrum</i>          | Bertram              | ST-BTA1       | ON733090          |
| <i>S. nigrum</i>               | Bertram              | ST-BTA2       | ON733091          |
| <i>S. nigrum</i>               | Bertram              | BTA4          | ON733069          |
| <i>S. nigrum</i>               | Bertram              | BTA5          | ON733070          |
| <i>S. nigrum</i>               | Bertram              | BTA6          | ON733071          |
| <i>S. nigrum</i>               | Bertram              | BTB1          | ON733072          |
| <i>S. nigrum</i>               | Bertram              | BTB3          | ON733073          |
| <i>S. nigrum</i>               | Bertram              | BTB6          | ON733074          |
| <i>S. nigrum</i>               | Bibra Lake           | BL5           | ON733067          |
| <i>S. nigrum</i>               | Bibra Lake           | BL8           | ON733068          |
| <i>Anthcercis littoria</i>     | Cervantes Dirt Track | DT3           | ON733048          |
| <i>A. littoria</i>             | Cervantes Dirt Track | DT4           | ON733049          |
| <i>A. littoria</i>             | Cervantes Sandhills  | SH1           | ON733050          |
| <i>A. littoria</i>             | Cervantes Sandhills  | SH2           | ON733051          |
| <i>A. littoria</i>             | Cervantes Sandhills  | SH7           | ON733052          |
| <i>A. littoria</i>             | Cervantes Sandhills  | SH8           | ON733053          |
| <i>A. littoria</i>             | Cervantes Sandhills  | SH11          | ON733054          |
| <i>A. littoria</i>             | Cervantes Sandhills  | SH12          | ON733055          |
| <i>A. littoria</i>             | Cervantes Sandhills  | SH14          | ON733056          |
| <i>A. littoria</i>             | Cervantes Sandhills  | SH15          | ON733057          |
| <i>S. nigrum</i>               | Dixon road           | ST-DR2        | ON733092          |
| <i>S. nigrum</i>               | Dixon road           | DR3           | ON733075          |
| <i>S. nigrum</i>               | Dixon road           | DR6           | ON733076          |
| <i>Anthocercis illicifolia</i> | Lake Thetis          | LT6           | ON733045          |
| <i>A. illicifolia</i>          | Lake Thetis          | LT7           | ON733046          |
| <i>A. illicifolia</i>          | Lake Thetis          | LT8           | ON733047          |
| <i>A. illicifolia</i>          | Ledge Point          | LP1           | ON733042          |
| <i>A. illicifolia</i>          | Ledge Point          | LP2           | ON733043          |
| <i>A. illicifolia</i>          | Ledge Point          | LP4           | ON733044          |
| <i>S. nigrum</i>               | Leeming              | LM3           | ON733077          |
| <i>S. nigrum</i>               | Leeming              | LM4           | ON733078          |
| <i>S. nigrum</i>               | Leeming              | LM6           | ON733079          |
| <i>S. nigrum</i>               | Leeming              | LM9           | ON733080          |
| <i>S. nigrum</i>               | Leeming              | LM10          | ON733081          |
| <i>S. nigrum</i>               | Leeming              | LMB1          | ON733082          |
| <i>S. nigrum</i>               | Leeming              | LMB3          | ON733083          |
| <i>S. nigrum</i>               | Leeming              | LMB6          | ON733084          |
| <i>S. nigrum</i>               | Leeming              | LMB7          | ON733085          |
| <i>S. nigrum</i>               | Leeming              | LMB2          | ON733086          |

|                           |         |      |          |
|---------------------------|---------|------|----------|
| <i>A. illicifolia</i>     | Yanchep | LY8  | ON733038 |
| <i>A. illicifolia</i>     | Yanchep | LY11 | ON733039 |
| <i>A. illicifolia</i>     | Yanchep | LY12 | ON733040 |
| <i>A. illicifolia</i>     | Yanchep | LY15 | ON733041 |
| <i>Physalis peruviana</i> | Yanchep | LY28 | ON733058 |
| <i>P. peruviana</i>       | Yanchep | LY31 | ON733059 |
| <i>P. peruviana</i>       | Yanchep | LY60 | ON733060 |
| <i>S. nigrum</i>          | Yanchep | LY34 | ON733061 |
| <i>S. nigrum</i>          | Yanchep | LY37 | ON733062 |
| <i>S. nigrum</i>          | Yanchep | LY41 | ON733063 |
| <i>S. nigrum</i>          | Yanchep | LY43 | ON733064 |
| <i>S. nigrum</i>          | Yanchep | LY51 | ON733065 |
| <i>S. nigrum</i>          | Yanchep | LY56 | ON733066 |

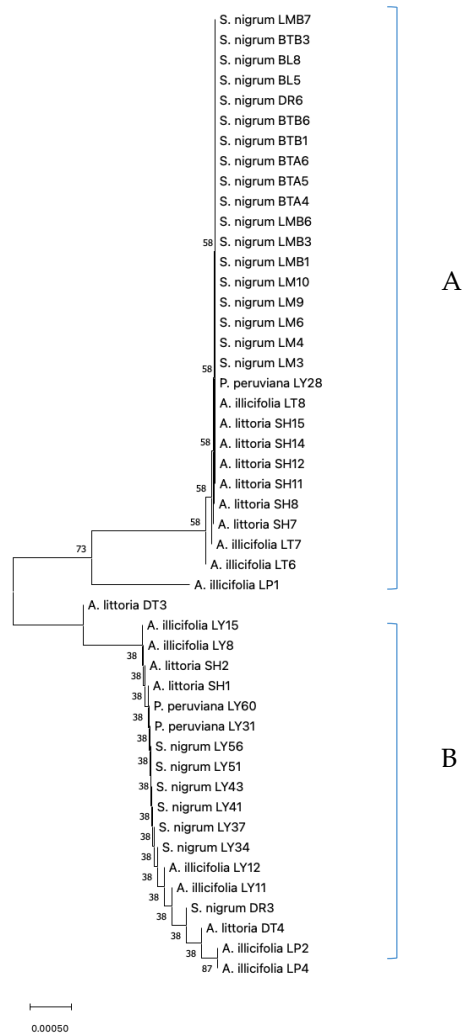

**Figure S1.** Pairwise comparison of partial CP sequences (356 nt) of 48 YTMMV isolates from wild plants, indigenous and exotic, inferred by the Neighbor-Joining method. Host species and virus isolate names are given (GenBank accession codes given in Table S1). Virus isolate names include the site from which they were collected: LY, Yanchep; LP, Ledge Point; LT, Lake Thetis; DT, Dirt Track (Cervantes region); SH, Sandhills (Cervantes); BL, Bibra lake; CR, Canning River; BTA and BTB, Bertram; MU, Murdoch; DR, Dixon Road; LM and LMB, Leeming. The isolates fell into two main groups (A and B) as marked. The tree was drawn to scale, with branch lengths in the same units as those of the evolutionary distances used to infer the phylogenetic tree. The units of the number of base substitutions per site.
